# Supplementary material for: Rivaroxaban versus Enoxaparin for Thromboprophylaxis after Hip Arthroplasty
Source: Atypon-hosted journal article supplement (doi:10.1056/nejmoa0800374), 2008-06-25

## Supplementary Appendix

This appendix has been provided by the authors to give readers additional information about their work.

Supplement to: Eriksson BI, Borris LC, Friedman RJ, et al. Rivaroxaban versus enoxaparin for thromboprophylaxis after hip arthroplasty. *N Engl J Med* 2008;358:2765-75.

Table I. Supplemental information regarding adverse events

|                                                                                                                                             | Rivaroxaban  | Enoxaparin   |
|---------------------------------------------------------------------------------------------------------------------------------------------|--------------|--------------|
|                                                                                                                                             | 10 mg od     | 40 mg od     |
|                                                                                                                                             | (n=2209)     | (n=2224)     |
| <b>Adverse events during treatment</b>                                                                                                      |              |              |
| Serious adverse events                                                                                                                      | 146 (6.6%)   | 181 (8.1%)   |
| Total with adverse events*                                                                                                                  | 1369 (62.0%) | 1370 (61.6%) |
| Adverse events leading to treatment discontinuation                                                                                         | 85 (3.8%)    | 100 (4.5%)   |
| <b>Adverse events during treatment with an incidence of ≥3% or difference of ten or more events between any treatment group<sup>†</sup></b> |              |              |
| Any event                                                                                                                                   | 1413 (64.0%) | 1439 (64.7%) |
| Blood and lymphatic system disorders                                                                                                        | 107 (4.8%)   | 105 (4.7%)   |
| Anemia                                                                                                                                      | 81 (3.7%)    | 81 (3.6%)    |
| Cardiac disorders                                                                                                                           | 84 (3.8%)    | 89 (4.0%)    |
| Bradycardia                                                                                                                                 | 7 (0.3%)     | 17 (0.8%)    |
| Ear and labyrinth disorders                                                                                                                 | 20 (0.9%)    | 9 (0.4%)     |
| Gastrointestinal disorders                                                                                                                  | 573 (25.9%)  | 614 (27.6%)  |
| Constipation                                                                                                                                | 148 (6.7%)   | 178 (8.0%)   |
| Nausea                                                                                                                                      | 228 (10.3%)  | 241 (10.8%)  |
| Vomiting                                                                                                                                    | 229 (10.4%)  | 221 (9.9%)   |
| General disorders and administration-site conditions                                                                                        | 400 (18.1%)  | 375 (16.9%)  |
| Chest pain                                                                                                                                  | 15 (0.7%)    | 29 (1.3%)    |
| Edema peripheral                                                                                                                            | 97 (4.4%)    | 83 (3.7%)    |
| Pyrexia                                                                                                                                     | 247 (11.2%)  | 233 (10.5%)  |
| Infections and infestations                                                                                                                 | 150 (6.8%)   | 151 (6.8%)   |
| Injury, poisoning, and procedural complications                                                                                             | 377 (17.1%)  | 356 (16.0%)  |
| Anemia post-operative                                                                                                                       | 113 (5.1%)   | 108 (4.9%)   |

|                                                  |             |             |
|--------------------------------------------------|-------------|-------------|
| Procedural pain                                  | 78 (3.5%)   | 80 (3.6%)   |
| Wound secretion                                  | 76 (3.4%)   | 55 (2.5%)   |
| Investigations                                   | 222 (10.0%) | 248 (11.2%) |
| Gamma-glutamyltransferase increased              | 27 (1.2%)   | 37 (1.7%)   |
| Hemoglobin decreased                             | 37 (1.7%)   | 50 (2.2%)   |
| Metabolism and nutrition                         | 50 (2.3%)   | 68 (3.1%)   |
| Musculoskeletal and connective tissue disorders  | 133 (6.0%)  | 123 (5.5%)  |
| Muscle spasms                                    | 27 (1.2%)   | 16 (0.7%)   |
| Nervous system disorders                         | 210 (9.5%)  | 182 (8.2%)  |
| Dizziness                                        | 72 (3.3%)   | 58 (2.6%)   |
| Headache                                         | 55 (2.5%)   | 45 (2.0%)   |
| Syncope                                          | 30 (1.4%)   | 16 (0.7%)   |
| Psychiatric disorders                            | 160 (7.2%)  | 155 (7.0%)  |
| Insomnia                                         | 87 (3.9%)   | 94 (4.2%)   |
| Renal and urinary disorders                      | 97 (4.4%)   | 89 (4.0%)   |
| Dysuria                                          | 22 (1.0%)   | 12 (0.5%)   |
| Respiratory, thoracic, and mediastinal disorders | 85 (3.8%)   | 89 (4.0%)   |
| Cough                                            | 14 (0.6%)   | 24 (1.1%)   |
| Skin and subcutaneous tissue disorders           | 176 (8.0%)  | 157 (7.1%)  |
| Blister                                          | 31 (1.4%)   | 14 (0.6%)   |
| Vascular disorders                               | 239 (10.8%) | 290 (13.0%) |
| Deep vein thrombosis                             | 38 (1.7%)   | 81 (3.6%)   |
| Hypotension                                      | 107 (4.8%)  | 112 (5.0%)  |

---

Data are n (%).

\*Excluding deep vein thrombosis, pulmonary embolism, and bleeding events

†According to MedDRA, descending total frequency

Figure 1: CONSORT diagram

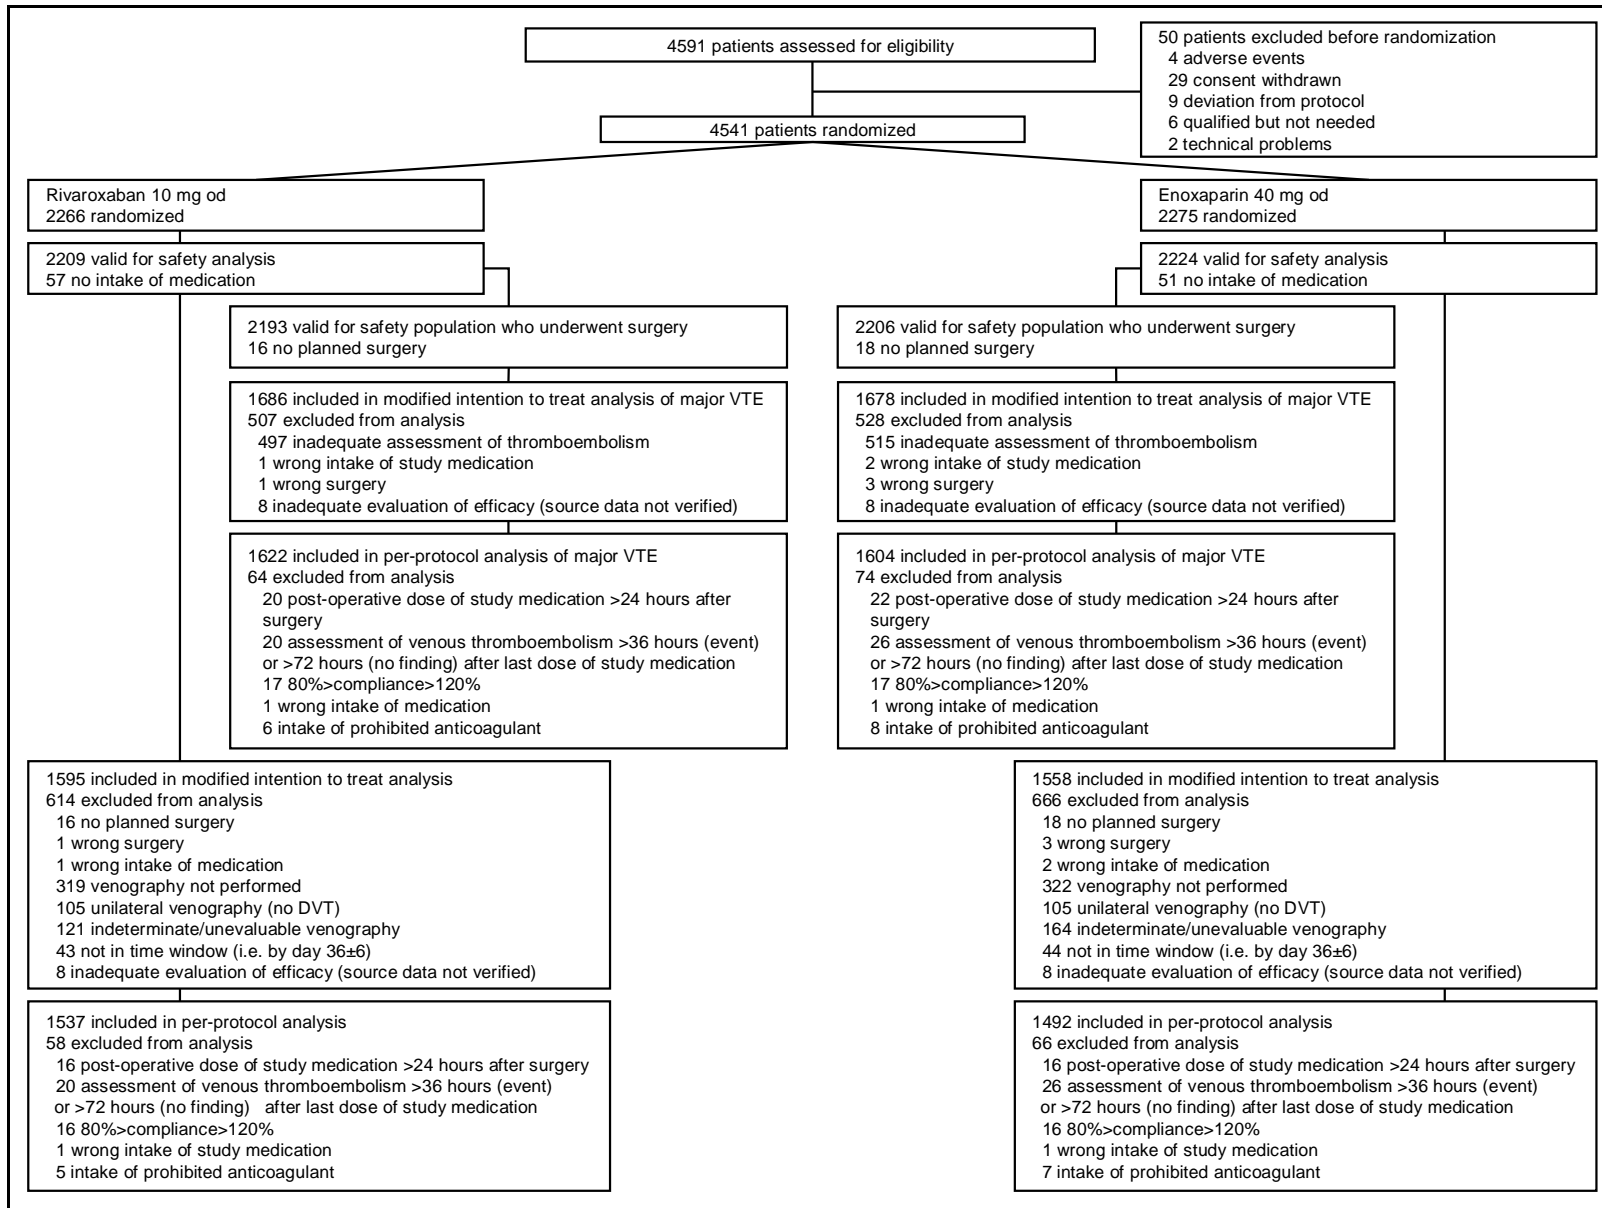

Supplement: nejm_eriksson_2765sa1.pdf [file nejm_eriksson_2765sa1.pdf]
